# Supplementary material for: Akt3 activation by R-Ras in an endothelial cell enforces quiescence and barrier stability of neighboring endothelial cells via Jagged1
Source: PubMed Central journal article supplement (PMC11056028; doi:10.1016/j.celrep.2024.113837), 2024-02-24
Supplement: NIHMS1980909-supplement-1.pdf [file NIHMS1980909-supplement-1.pdf]

**Cell Reports, Volume 43**

**Supplemental information**

**Akt3 activation by R-Ras in an endothelial  
cell enforces quiescence and barrier stability  
of neighboring endothelial cells via Jagged1**

**Jose Luis Herrera and Masanobu Komatsu**

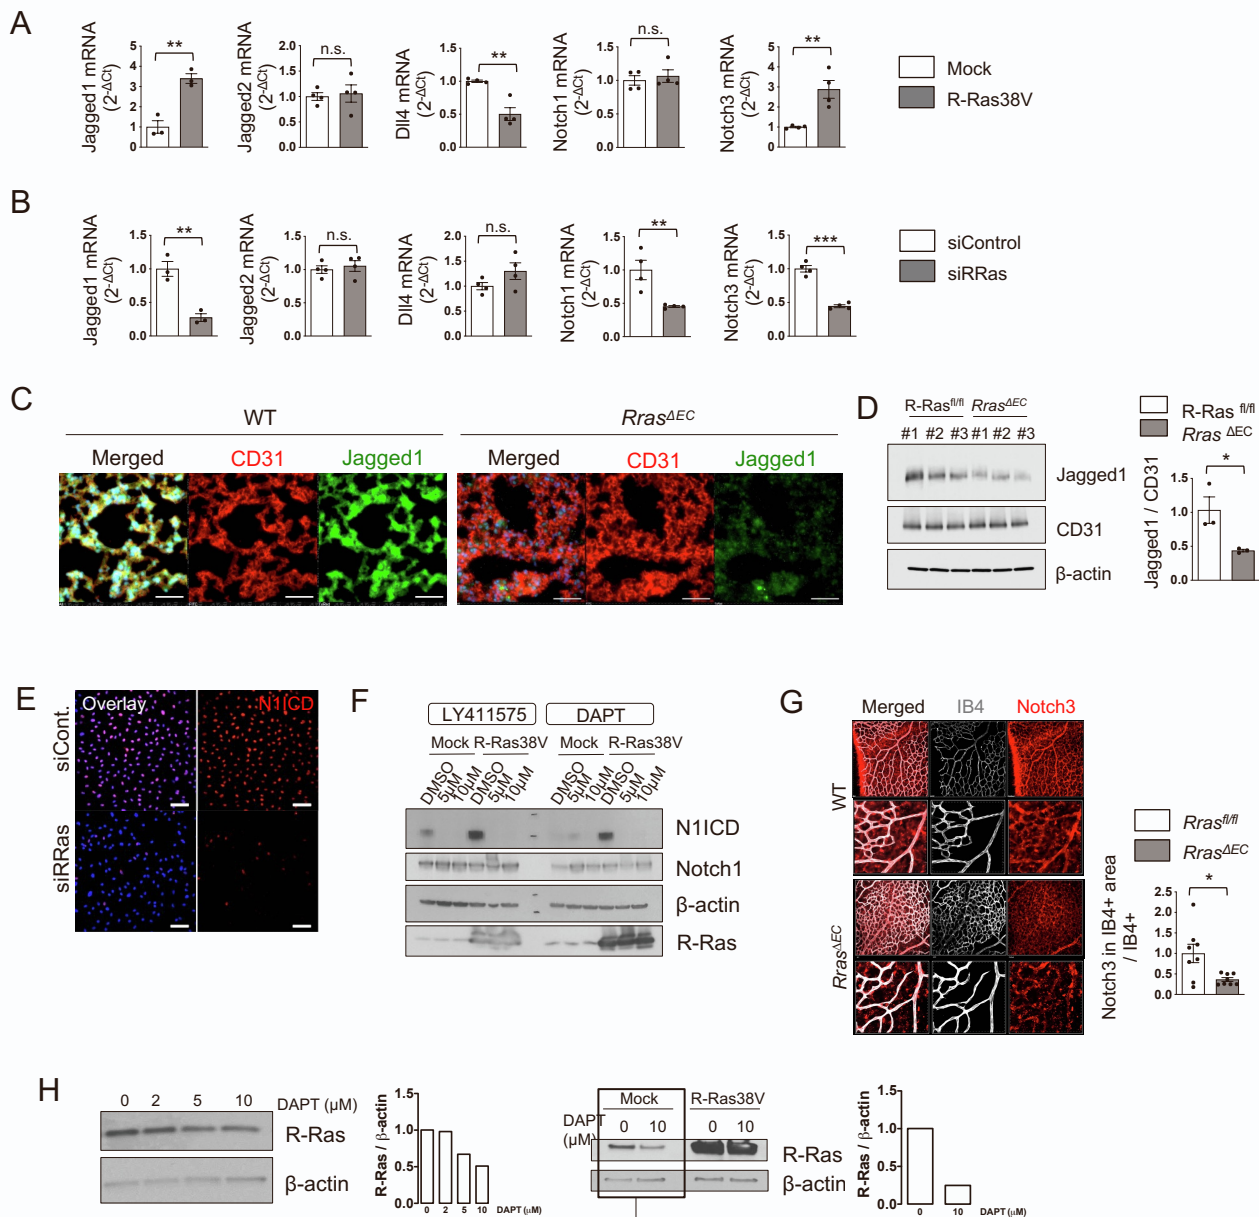

**Supplementary Figure 1: R-Ras upregulates Jagged1 and activates Notch in ECs. Related to Figure 1.**

a) mRNA analysis by RT-qPCR of various Notch ligands and receptors in mock or R-Ras38V-transduced ECs. N=3-4 b) mRNA analysis by RT-qPCR of various Notch ligands and receptors in and R-Ras-silenced ECs. N=3-4 c) Jagged1 expression in lung capillary ECs was analyzed in *cdh5-Cre;Rras<sup>fl/fl</sup>* mice (*Rras<sup>ΔEC</sup>*) and *Rras<sup>fl/fl</sup>* wild-type control mice (WT) by immunostaining. Scale bar, 50 μm d) Analysis of Jagged1 expression by western blot of whole lung tissue lysate from *Rras<sup>ΔEC</sup>* mice. Three representative mice (#1-3) were shown for each group e) N1ICD nuclear accumulation was analyzed by immunofluorescence and DAPI staining of R-Ras-silenced ECs f) N1ICD level was analyzed by western blot in mock or R-Ras38V-transduced ECs after treatment for 48 hours with γ-secretase inhibitor LY411575 or DAPT at different doses g) Notch3 expression in postnatal retina ECs was analyzed in *cdh5-Cre;Rras<sup>fl/fl</sup>* mice (*Rras<sup>ΔEC</sup>*) and *Rras<sup>fl/fl</sup>* wild-type control mice (WT) by immunostaining. Notch3 intensity within CD31+ area was quantified and normalized to the total CD31+ area. N=3 mice. Data points indicate 2-3 pictures analyzed for each retina and are represented as mean ± SEM h) Notch inhibition decreases R-Ras expression in parental (top panel) or mock-transduced ECs in a DAPT dose dependent manner.

A

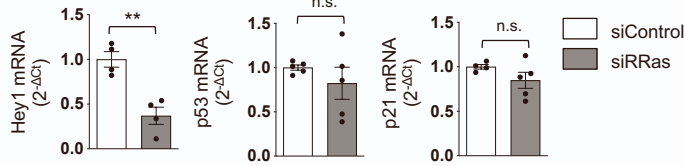

B

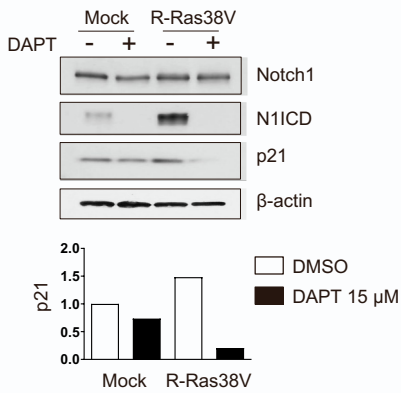

C

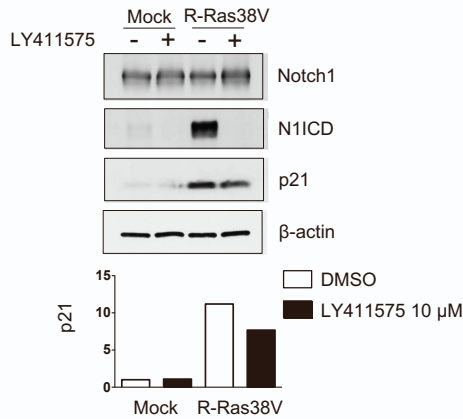

D

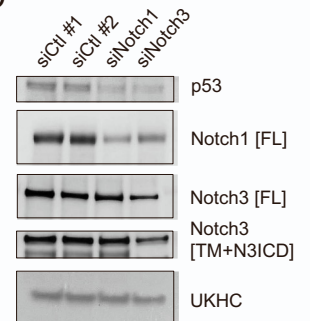

**Supplementary Figure 2: R-Ras upregulates Hey1, p21, and p53 via Jagged1-Notch. Related to Figure 2.**

- mRNA analysis by RT-qPCR of Notch target genes in siControl or R-Ras-silenced ECs.
- Analysis of p21 and N1ICD by western blot in mock or R-Ras38V-transduced ECs after treatment with 15 μM DAPT for 48 hours. The quantified band intensity was normalized to β-actin.
- Analysis of p21 and N1ICD by western blot in mock or R-Ras38V-transduced ECs after treatment with 10 μM LY411575 for 48 hours.
- Analysis of p53 by western blot in Notch1- or Notch3-silenced ECs. UKHC was used as a loading control.

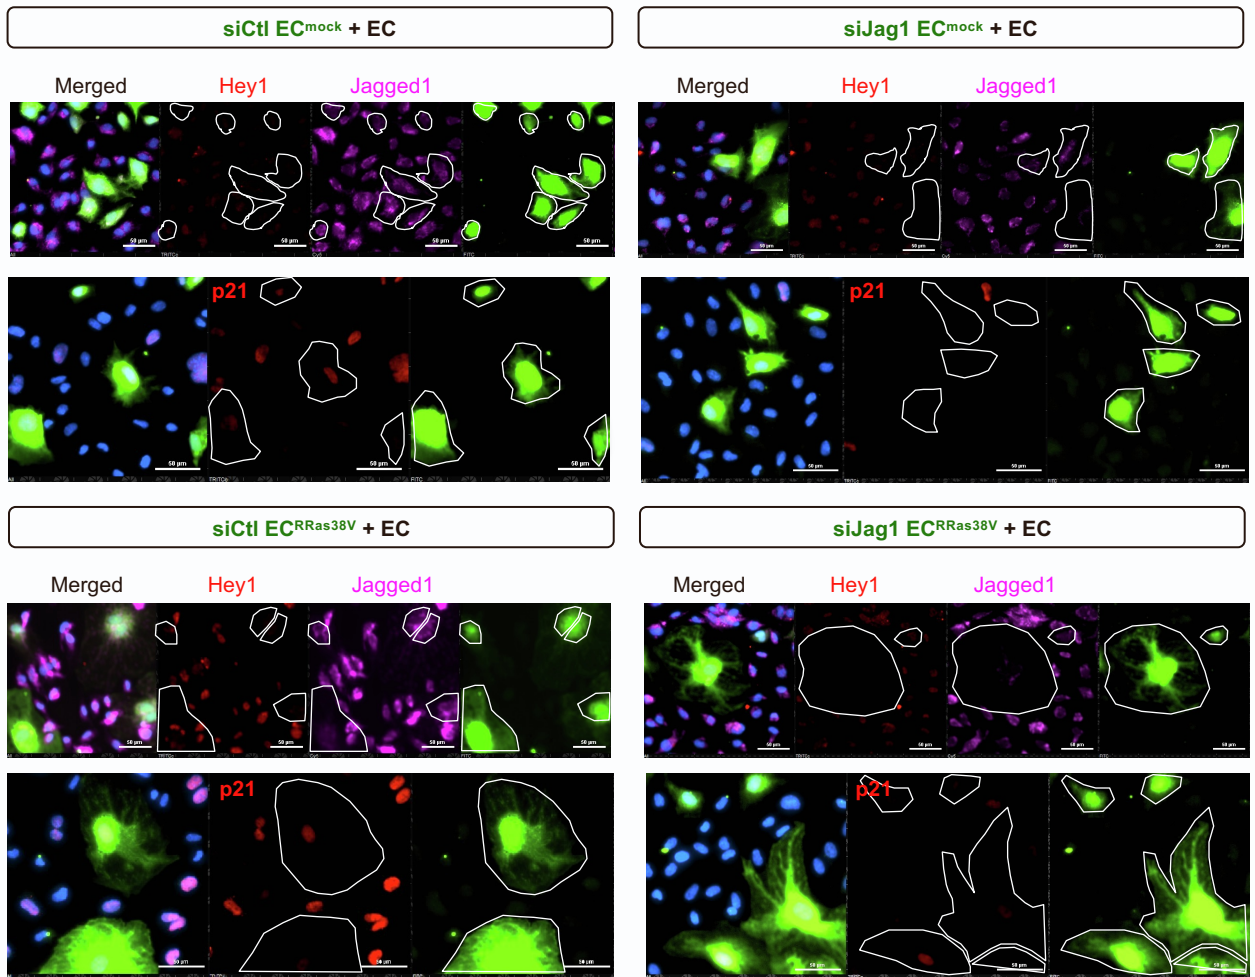

**Supplementary Figure 3: Analysis of Notch-target genes in Jagged1- silenced mock or R-Ras38V-transduced ECs. Related to Figure 2G.**

Jagged1 was silenced in mock control (EC<sup>mock</sup>) or R-Ras38V-transduced ECs (EC<sup>Ras38V</sup>) and fluorescently labeled (green), and then co-cultured with unlabeled, non-transduced parental ECs (EC) at 1:3 ratio. The cultures were immunostained with indicated antibodies.

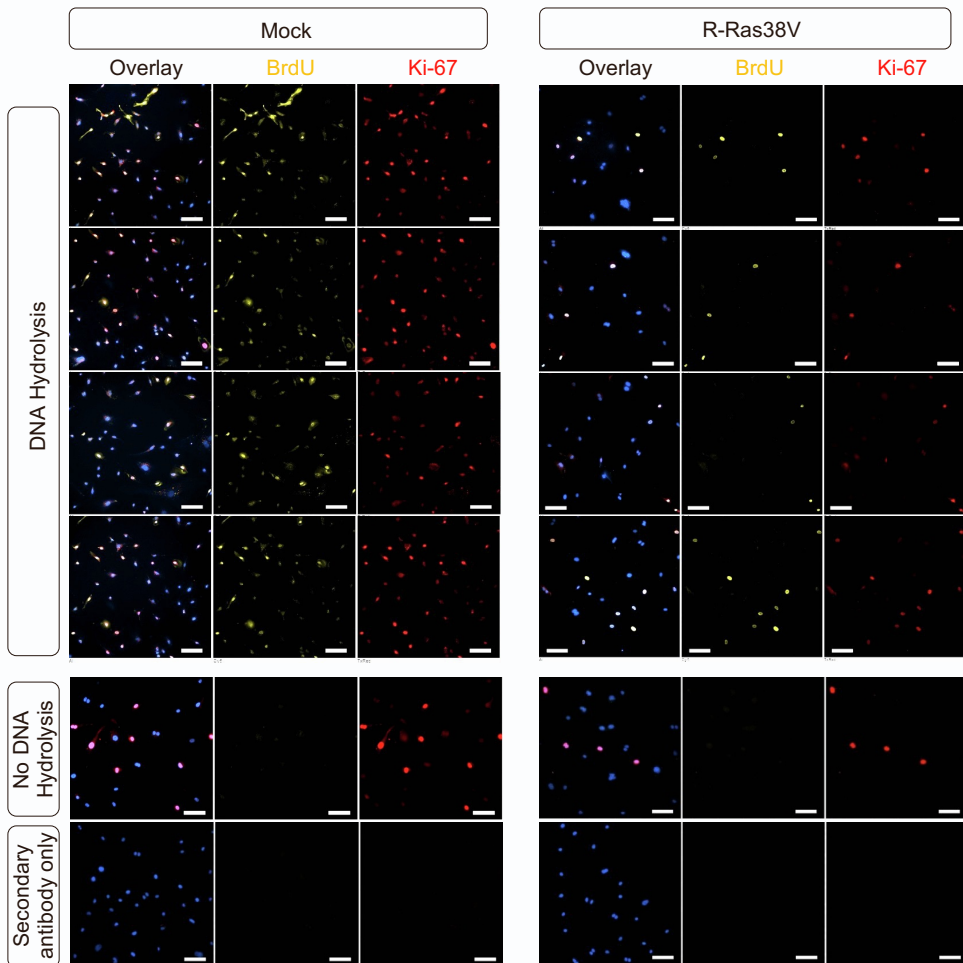

**Supplementary Figure 4: BrdU incorporation assay to assess cell proliferation. Related to Figure 3B.**

BrdU incorporation and Ki-67 staining of mock and R-Ras38V-expressing ECs to assess cell cycling.

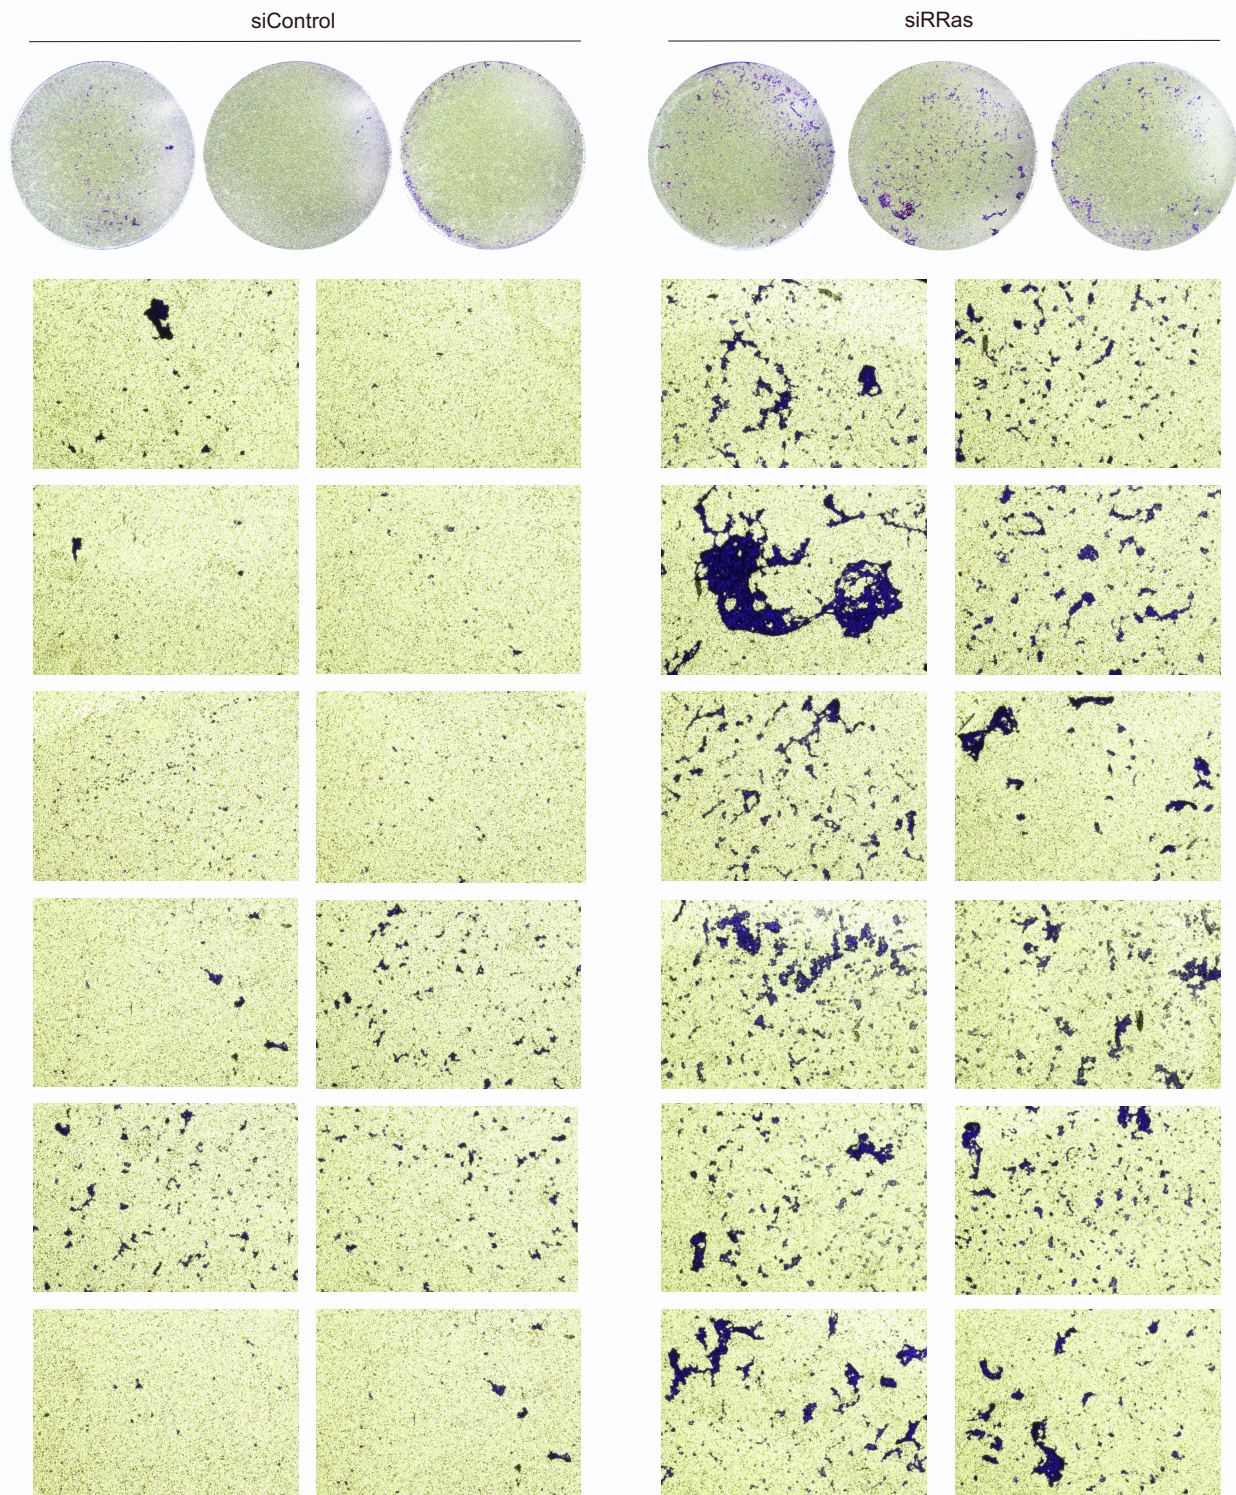

**Supplementary Figure 5: Transwell migration assay in RRAS-silenced ECs. Related to Figure 3G.**

Transwell migration assay of control and R-Ras-silenced ECs. Cells migrated to the bottom side of the Transwell inserts were stained with 0.5% crystal violet.

A

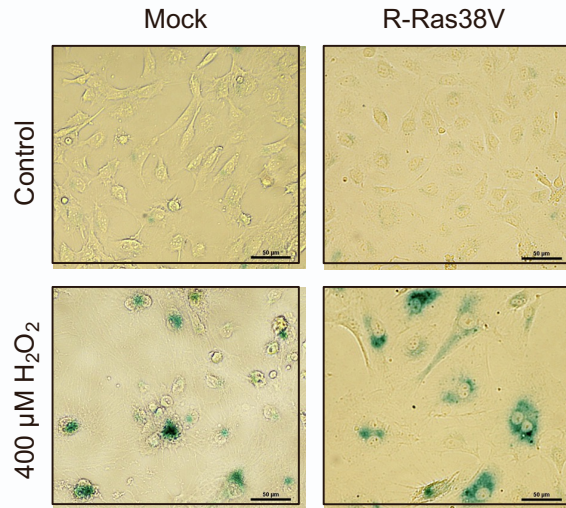

B

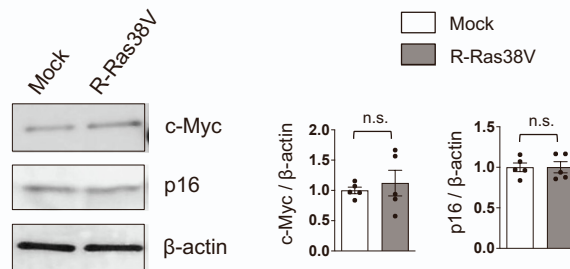

**Supplementary Figure 6: Analysis of cell senescence in mock or R-Ras38V-transduced ECs.**

a) Cell senescence was evaluated by  $\beta$ -Galactosidase staining in mock or R-Ras38V-transduced ECs. Hydrogen peroxide was used to induce cell senescence as a positive control.

b) Western blot analyses and quantification of the expression of senescence markers (c-Myc and p16) of mock or R-Ras-transduced ECs. N=5.

n.s., not significant

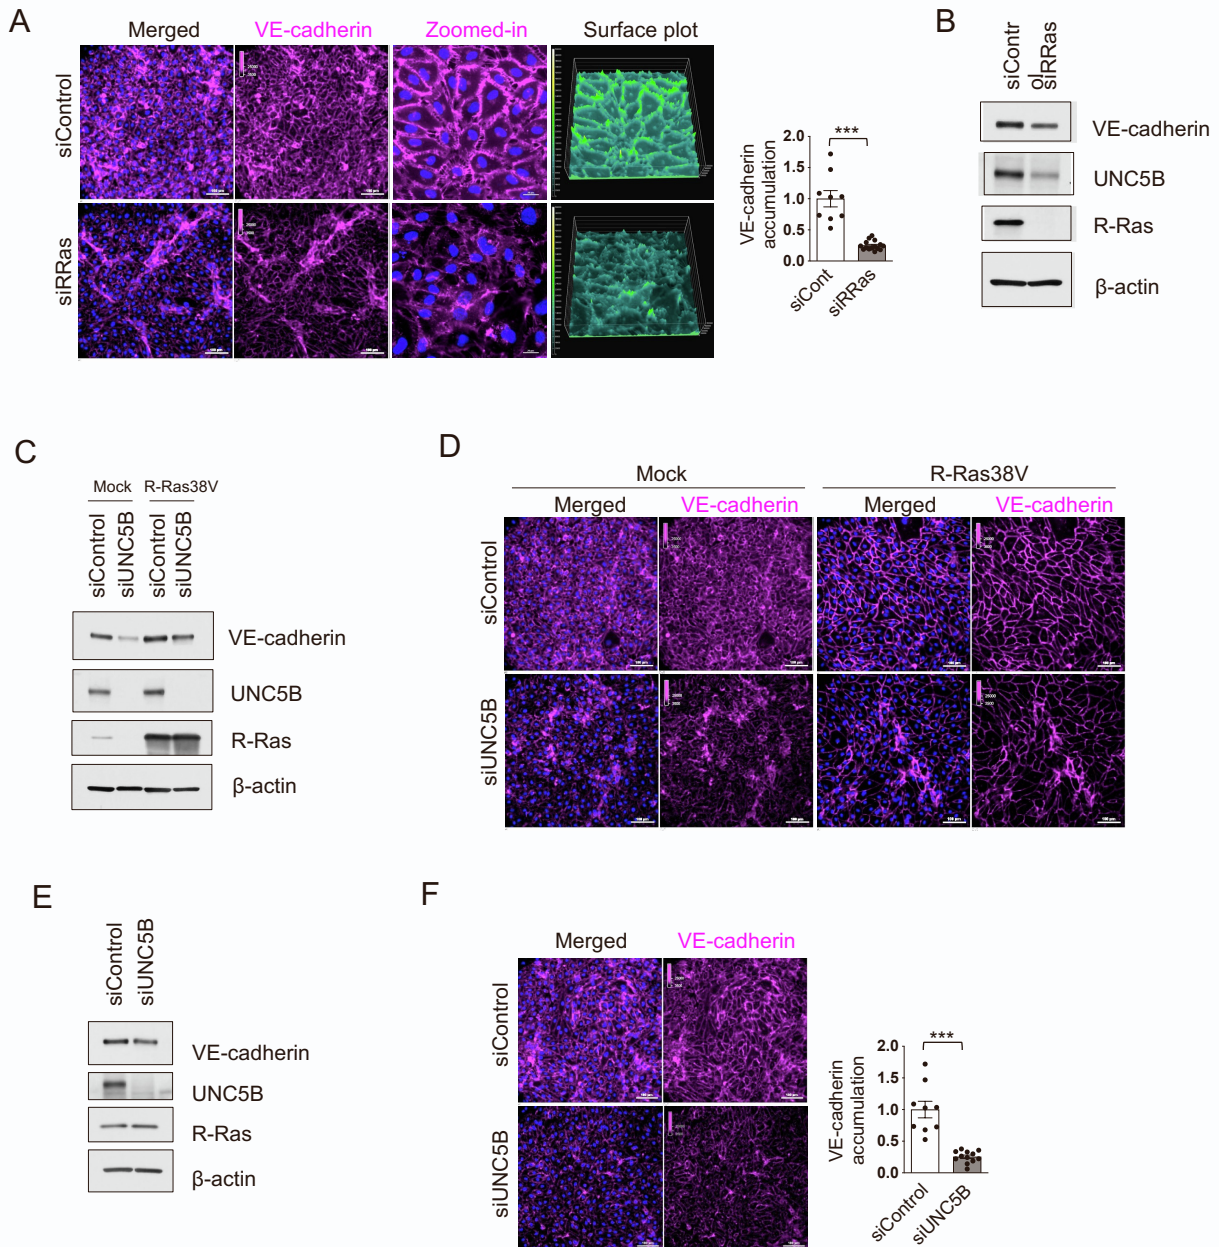

**Supplementary Figure 7: Effect of R-Ras on barrier integrity and contribution of UNC5B. Related to Figure 4.**

a) VE-cadherin accumulation at cell-cell junction (magenta) was visualized and quantified in control or R-Ras-silenced EC monolayer by immunofluorescence. DAPI nuclear staining (blue). Surface plots images indicate the levels of fluorescence intensity in color scale.

b) VE-cadherin and UNC5B expression were analyzed by western blot of control and R-Ras-silenced ECs.

c) The effect of UNC5B silencing on the VE-cadherin protein level was analyzed in mock or R-Ras38V-transduced ECs by western blot.

d) The effect of UNC5B silencing on VE-cadherin accumulation at the cell-cell junction was analyzed in monolayer of mock or R-Ras38V-transduced ECs by immunofluorescence.

e) VE-cadherin and UNC5B western blot of ECs with or without UNC5B silencing.

f) VE-cadherin immunofluorescence intensity of parental ECs with or without UNC5B silencing was quantified. N=4 wells, 2 or more pictures analyzed per well. \*\*\*p<0.001



A

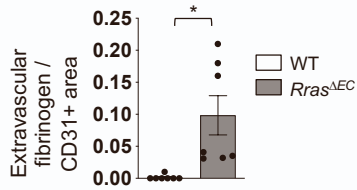

B

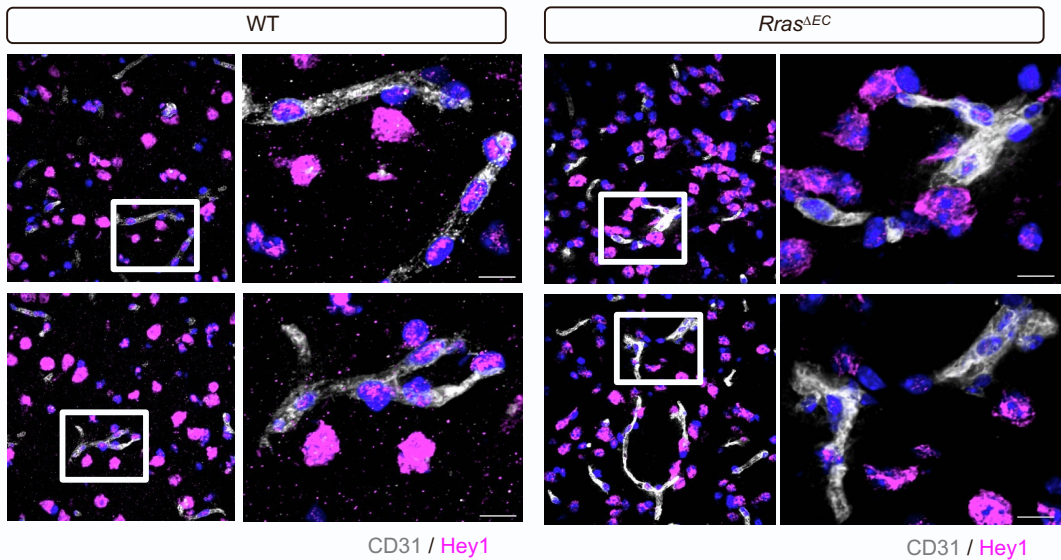

**Supplementary Figure 8: Abnormalities in retinal and cerebral vasculature of *Rras*<sup>ΔEC</sup> mice. Related to Figure 5.**

a) Extravascular fibrinogen in the adult retina was analyzed by immunostaining in 3D-reconstructed confocal images. Fluorescence intensity (arbitrary unit) was normalized to the total CD31<sup>+</sup> area. N = 7 retinas per group

b) CD31 and Hey1 immunofluorescence staining of the hippocampus. Hey1 (magenta) is readily detected in the nuclei (blue) of wild-type hippocampal microvascular ECs (white) consistent with the active Notch signaling. In comparison, a marked decrease of nuclear Hey1 is found in the *Rras*<sup>ΔEC</sup> hippocampal microvascular ECs. Areas in white rectangles are magnified. Scale bars, 50 μm

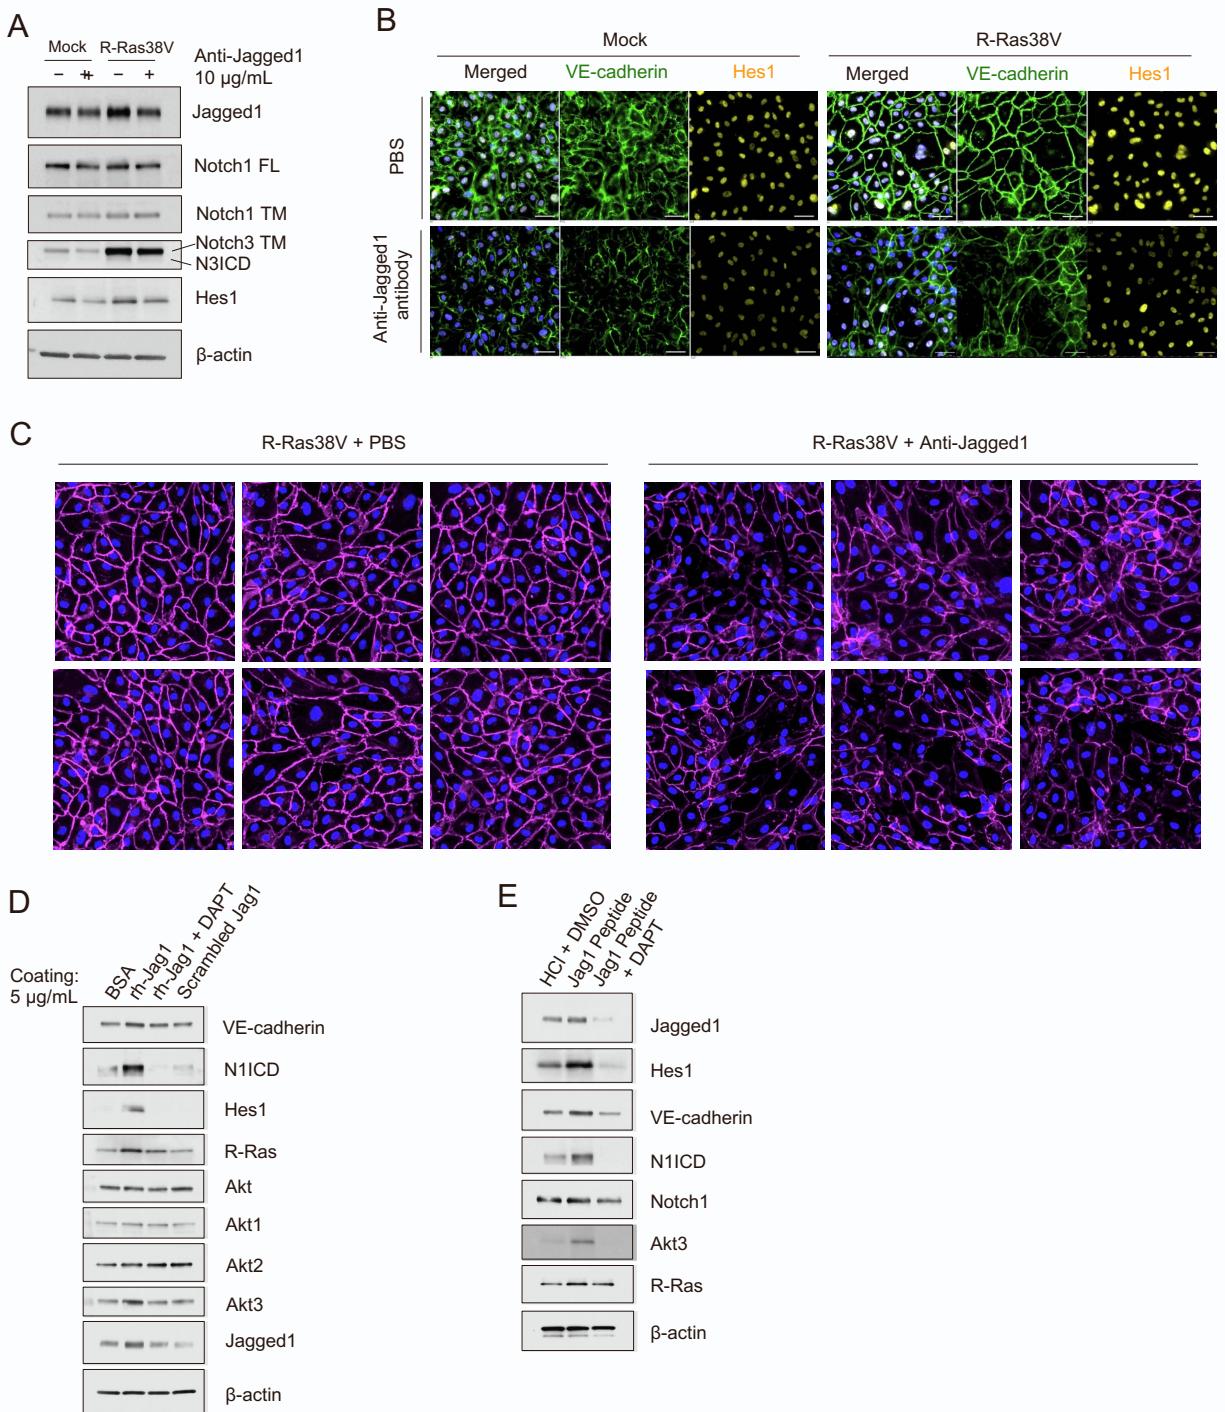

**Supplementary Figure 9: Notch-dependent autoregulation of Jagged1.**

a) Jagged-1 neutralization assay. ECs were exposed to anti-Jagged1 antibody (10 µg/ml) for 48 hours, and Jagged-1 expression was analyzed by western blot b) Effect of Jagged-1 neutralization on ECs. Mock or R-Ras38V-transduced ECs were exposed to anti-Jagged1 antibody for 48 hours, and VE-cadherin accumulation and Hes1 levels were analyzed in cell monolayers by immunofluorescence c) Effect of Jagged1 neutralization on VE-cadherin accumulation in mock or R-Ras38V-expressing ECs d) The effects of Notch activation by immobilized recombinant human Jagged1 (rh-Jag1). ECs were cultured on Jagged1-coated plates for 48 hours, and the expression of VE-cadherin, R-Ras, Akt isoforms, and Jagged-1 was determined by western blot. A scrambled Jagged1 was used as a negative control e) ECs were exposed to a Jagged1 peptide for 48 hours to activate Notch signaling, and the effects on VE-cadherin, R-Ras, Akt isoforms, and Jagged-1 expression were analyzed by western blot.

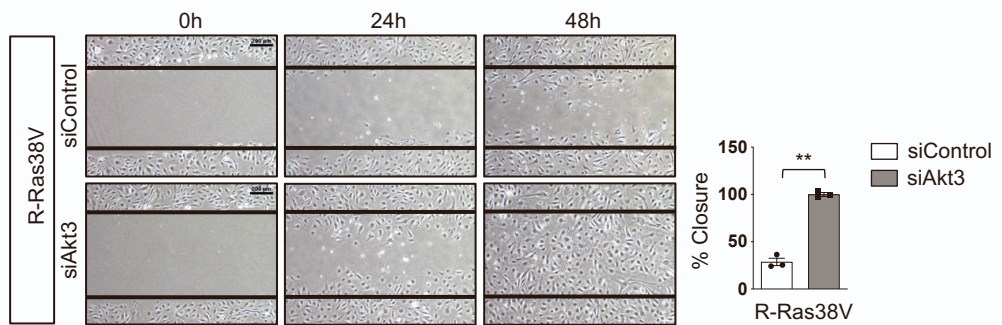

**Supplementary Figure 10: Akt3 silencing reverses inhibition of EC migration by R-Ras. Related to Figure 6.**

Scratch wound assay of R-Ras38V-transduced ECs upon silencing of Akt3. Data is presented as percentage of wound closure after 48 hours. N=3 culture dishes were analyzed.

Control (foot skin)

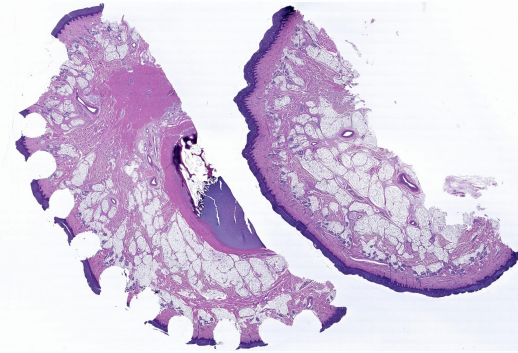

Control (chest-left)

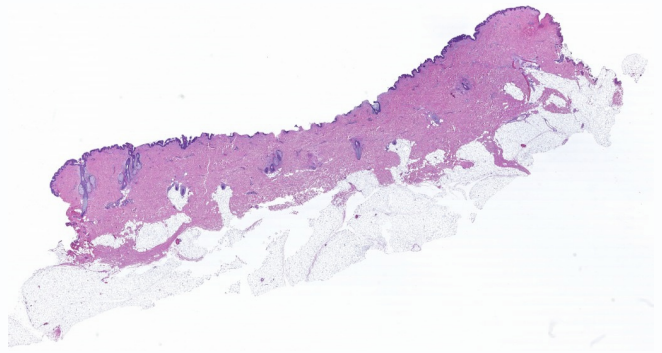

Infantile hemangioma (posterior neck)

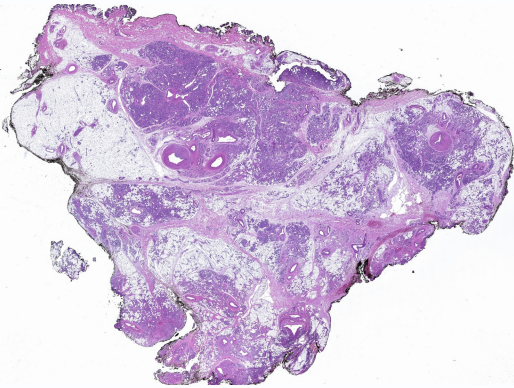

Infantile capillary hemangioma (forehead)

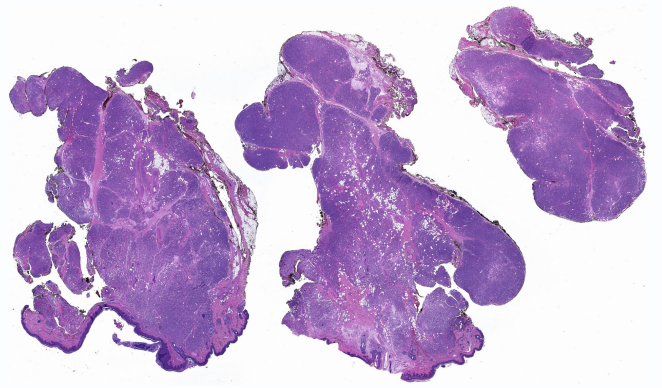

Kaposiform Hemangioendothelioma (forearm)

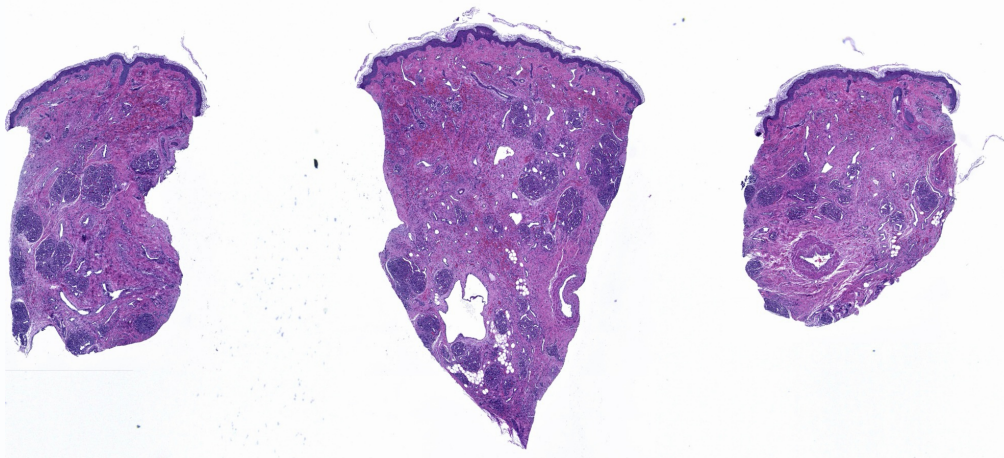

**Supplementary Figure 11: Hematoxylin and Eosin staining of pediatric vascular tumors (hemangiomas).** Standard hematoxylin and eosin staining (H&E) was used to confirm the histological diagnosis of several hemangioma specimens. Pediatric skin samples from foot and chest were used as controls.

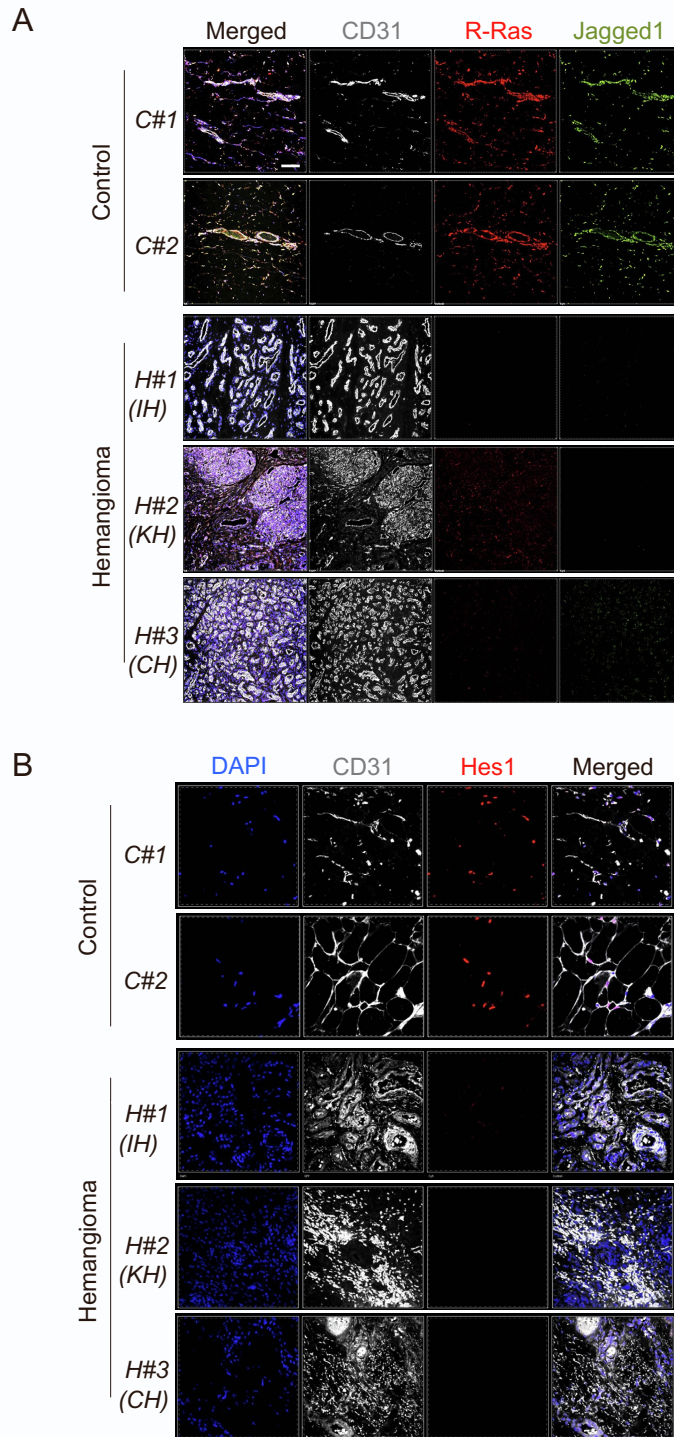

**Supplementary Figure 12: Downregulation of R-Ras, Jagged1 and Hes1 in hemangioma and hemangioendothelioma.**

a) CD31, R-Ras and Jagged1 immunofluorescence staining of pediatric skin control or hemangioma samples. R-Ras and Jagged1 are strongly downregulated in all samples analyzed from three patients with hemangioma, compared to control skin samples. C#1: pediatric skin from foot; C#2: pediatric skin from left chest; H#1: infantile hemangioma (IH; skin and subcutaneous tissue from posterior neck, 5-year-old male); H#2: kaposiform hemangioendothelioma (KH; skin, left forearm, 2-week-old male); H#3: infantile capillary hemangioma of face (CH; skin, forehead lesion, male, 1 year old). Scale bar, 100  $\mu$ m

b) Similar analysis of Hes1 expression.

| siRNA OLIGONUCLEOTIDES                | SOURCE                    | IDENTIFIER |
|---------------------------------------|---------------------------|------------|
| siRNA targeting <i>AKT1</i>           | Millipore, Sigma          | siHK0094   |
| siRNA targeting <i>AKT2</i>           | Millipore, Sigma          | siHK0099   |
| siRNA targeting <i>AKT3</i>           | Millipore, Sigma          | siHK0100   |
| siRNA targeting <i>AKT3</i>           | Ambion, Life Technologies | s19428     |
| siRNA Universal Negative Control No.1 | Millipore, Sigma          | siC001     |
| siRNA targeting <i>JAG1</i>           | Ambion, Life Technologies | s1175      |
| siRNA targeting <i>NOTCH1</i>         | Ambion, Life Technologies | s453558    |
| siRNA targeting <i>NOTCH3</i>         | Ambion, Life Technologies | s9640      |
| siRNA targeting <i>UNC5B</i>          | Ambion, Life Technologies | s47701     |
| siRNA targeting <i>RRAS</i>           | Ambion, Life Technologies | 4390827    |
| siRNA Select Negative Control No.2    | Ambion, Life Technologies | 4390846    |

**Supplementary Table 1: siRNA oligonucleotides used for gene silencing. Related to STAR Methods.**

| <b>Target gene</b>     | <b>Forward primer</b>                                            | <b>Reverse primer</b>            |
|------------------------|------------------------------------------------------------------|----------------------------------|
| <i>AKT1</i>            | 5' GTT TTT GGG CTT GCG CTG GA                                    | 5' TCC CCA GAC TAG GAA AGC AAA G |
| <i>AKT2</i>            | 5' AAA GAA GGC TGG CTC CAC AA                                    | 5' GTC GCT CTT CAG CAG GAA GT    |
| <i>AKT3</i>            | 5' CTC ACT GAA AGG GGG CAT GT                                    | 5' GCT CCT AGC ACC AAA GGG TT    |
| <i>NOTCH1</i> Duplex 1 | 5' CCA CCC CTC CTA GTT TGG GA                                    | 5' CCT CAC TGG CAT GAC ACA CA    |
| <i>NOTCH1</i> Duplex 2 | 5' TTG TTA GCC CCG TTC TTC AG                                    | 5' GTC AAC GCC GTA GAT GAC C     |
| <i>NOTCH2</i>          | 5' CCC AAT GGG CAA GAA GTC TA                                    | 5' CAC AAT GTG GTG GTG GGA TA    |
| <i>NOTCH3</i>          | 5' TGA GAC GCT CGT CAG TTC TT                                    | 5' TGG AAT GCA GTG AAG TGA GG    |
| <i>NOTCH4</i>          | Human Notch4 qPCR Primer Pair Cat: HP104650 SinoBiological (USA) |                                  |
| <i>JAG1</i>            | 5' TCA CGG GAA GTG CAA GAG TC                                    | 5' TGC AAG TGC CAC CGT TTC TA    |
| <i>JAG2</i>            | 5' GCG ATC TCT CCA CTG TGC TT                                    | 5' GTG GAC AGT TCC GAG GGT TC    |
| <i>DLL4</i>            | 5' GGG CAC CTA CTG TGA ACT CC                                    | 5' CCA TTC TCC AGG TCA TGG CA    |
| <i>TP53</i>            | 5' CCT ATG GAA ACT ACT TCC TGA<br>AAA                            | 5' TCC GGG GAC AGC ATC AAA TC    |
| <i>CDKN1A</i>          | 5' GCA GAC CAG CAT GAC AGA TTT                                   | 5' GGA TTA GGG CTT CCT CCT GGA   |
| <i>HEY1</i>            | 5' TGG ATC ACC TGA AAA TGC TG                                    | 5' TTG TTG AGA TGC GAA ACC AG    |
| <i>CDH5</i>            | 5' GTC CTG CAG ATC TCC GCA AT                                    | 5' TGT TGG CCG TGT TAT CGT GA    |
| <i>18S</i>             | 5' TGT GCC GCT AGA GGT GAA ATT                                   | 5' TGG CAA ATG CTT TCG CTT T     |

**Supplementary Table 2: qPCR primers used for gene expression studies. Related to STAR Methods.**
